# Supplementary material for: Synergistic inhibition of fluoride and epigallocatechin gallate on Streptococcus mutans biofilms
Source: Research Square preprint supplement (doi:10.21203/rs.3.rs-7745728/v1), 2025-11-05
Supplement: Supplementary file 1 [file f3dd2a9090cfd6137f239c53.docx]

**Supplementary material**

**Material and Methods**

**Transcriptome analysis**

Total RNA was extracted and subjected to ribosomal RNA depletion, fragmentation, and cDNA synthesis using random hexamer primers with dUTP strand-specific labeling. Sequencing libraries were prepared via end repair, A-tailing, adapter ligation, and size selection, followed by quality assessment (Qubit, qPCR, Bioanalyzer). Sequencing was performed on the Illumina platform using sequencing-by-synthesis chemistry.

Raw reads were trimmed and filtered using *fastp* to remove adapter sequences and low-quality reads (Q20/Q30). Then clean reads were aligned to the *S. mutans* UA159 reference genome using Bowtie2 (v2.5.4). Rockhopper was used to identify novel transcripts, transcription start and termination sites (TSS/TTS), antisense RNAs, and operons. Promoter regions were predicted using a time-delay neural network (TDNN), and Shine-Dalgarno sequences and terminators were identified with RBSfinder and TransTermHP, respectively. Functional annotation and prediction of small non-coding RNAs were performed using RNAfold and IntaRNA.

Gene expression levels were normalized as FPKM and analyzed for differential expression using *DESeq2* (for replicates; adjusted p, padj ≤ 0.05, |log2FC| ≥ 0) or *edgeR* (no replicates; padj ≤ 0.005, |log2FC| ≥ 1). Functional enrichment was performed using clusterProfiler to identify significant Gene Ontology (GO) terms and KEGG pathways.

**TMT labeling proteomic analyses**

Total protein was extracted from biofilm samples using SDT lysis buffer supplemented with DTT (1:100, v/v), followed by 5 min sonication on ice. Then, after centrifugation (12,000 × g, 15 min, 4°C), the supernatant was collected and incubated with sufficient IAM for 2 h. The mixture was centrifuged again (12,000 × g, 15 min, 4°C), and the pellet was washed with cold acetone and re-dissolved in DB buffer (8 M urea, 100 mM TEAB, pH 8.5). Protein concentrations were quantified using the BCA assay. Samples were digested overnight at 37°C in DB buffer with trypsin and TEAB. Lyophilized peptides were reconstituted in 0.1% formic acid and centrifuged (14,000 × g, 20 min, 4°C). A 200 ng aliquot of each clarified supernatant was loaded onto a Vanquish Neo UHPLC system (Thermo Fisher Scientific). Peptide separation was achieved using a reversed-phase C18 trap column (5 mm × 300 μm, 5 μm) and an analytical column (150 mm × 150 μm, 2 μm) at 50°C. Elution employed a linear gradient with solvent A (0.1% formic acid in water) and solvent B (80% acetonitrile with 0.1% formic acid).

Mass spectrometry was performed on an Orbitrap Astral mass spectrometer (Thermo Fisher Scientific) using data-independent acquisition (DIA) mode. MS1 spectra (m/z 380–980) were acquired at 240,000 resolution, and MS2 spectra (m/z 150–2000) at 80,000 resolution. Fragmentation utilized 300 variable isolation windows (2 Th) with an NCE of 25%. DIA data were processed using DIA-NN software with default parameters. Mass tolerances were 10 ppm (precursor) and 0.02 Da (fragment). Carbamidomethylation of cysteine was set as a fixed modification, and methionine oxidation and N-terminal acetylation were variable. Up to two missed cleavages were allowed. Peptides and proteins were filtered at a 1% FDR.

Protein quantification was conducted with thresholds of *p* < 0.05 and |log₂FC| above a defined cutoff. GO terms, KEGG pathway (*p* < 0.05) and differentially expressed proteins (DEPs, |fold change| > 1.2 or ＜0.83, *p* < 0.05) were visualized.

**Untargeted metabolomics analysis**

Biofilm samples were harvested, lyophilized, and extracted with ice-cold 80% methanol. Following centrifugation (15,000 × g, 15 min, 4°C), supernatants were diluted to 53% methanol and centrifuged again. Metabolites were separated using a Vanquish UHPLC system (Hypersil GOLD column, 100 × 2.1 mm, 1.9 μm) under a 12-min gradient at 0.2 mL/min with solvent A (0.1% formic acid in water) and solvent B (methanol). Mass spectrometry was performed on a Q Exactive HF/X instrument in polarity switching mode (±3.5 kV) with the following settings: capillary temperature 320°C, sheath gas 35 psi, and auxiliary gas 10 L/min.

Raw data were processed using XCMS for peak detection, alignment, and quantification. Metabolites were identified by spectral matching within a 10 ppm tolerance against KEGG, HMDB, and LIPIDMAPS databases. Quality control–based normalization (CV <30%) was applied prior to statistical analysis. Multivariate analyses included principal component analysis (PCA) and partial least squares discriminant analysis (PLS-DA) via the metaX platform, alongside univariate t-tests (VIP >1, *p* < 0.05, fold change ≥2 or ≤0.5). Differential metabolites were visualized using volcano plots and z-score normalized heatmaps. Pearson correlation and pathway enrichment analysis (x/n > y/N, *p* < 0.05) were performed to explore significant metabolic pathways and network alterations.

**Results**

Table S1 Significant GO term in HC vs. control comparison

| GOID | Description | GeneRatio | BgRatio | pvalue | padj |
| --- | --- | --- | --- | --- | --- |
| GO:0019725 | cellular homeostasis | 10/494 | 10/785 | 0.009414 | 0.636676 |
| GO:0050794 | regulation of cellular process | 85/494 | 118/785 | 0.015976 | 0.636676 |
| GO:0055114 | oxidation-reduction process | 49/494 | 65/785 | 0.018883 | 0.636676 |
| GO:0050789 | regulation of biological process | 85/494 | 119/785 | 0.022581 | 0.636676 |
| GO:0018130 | heterocycle biosynthetic process | 105/494 | 150/785 | 0.027751 | 0.636676 |
| GO:0006260 | DNA replication | 14/494 | 16/785 | 0.03023 | 0.636676 |
| GO:0009059 | macromolecule biosynthetic process | 139/494 | 203/785 | 0.034076 | 0.636676 |
| GO:0065007 | biological regulation | 86/494 | 122/785 | 0.036287 | 0.636676 |
| GO:1901362 | organic cyclic compound biosynthetic process | 106/494 | 153/785 | 0.041751 | 0.636676 |
| GO:0034645 | cellular macromolecule biosynthetic process | 137/494 | 201/785 | 0.044315 | 0.636676 |
| GO:0042592 | homeostatic process | 10/494 | 11/785 | 0.04476 | 0.636676 |
| GO:0044249 | cellular biosynthetic process | 192/494 | 287/785 | 0.04698 | 0.636676 |
| GO:0009058 | biosynthetic process | 211/494 | 317/785 | 0.048343 | 0.636676 |
| GO:0010467 | gene expression | 139/494 | 205/785 | 0.054438 | 0.636676 |
| GO:1901576 | organic substance biosynthetic process | 192/494 | 288/785 | 0.057463 | 0.636676 |
| GO:0019438 | aromatic compound biosynthetic process | 103/494 | 150/785 | 0.062877 | 0.636676 |
| GO:0006351 | transcription, DNA-templated | 70/494 | 100/785 | 0.071371 | 0.636676 |
| GO:0032774 | RNA biosynthetic process | 70/494 | 100/785 | 0.071371 | 0.636676 |
| GO:0097659 | nucleic acid-templated transcription | 70/494 | 100/785 | 0.071371 | 0.636676 |
| GO:0019222 | regulation of metabolic process | 66/494 | 94/785 | 0.072968 | 0.636676 |
| GO:0080090 | regulation of primary metabolic process | 66/494 | 94/785 | 0.072968 | 0.636676 |
| GO:0005975 | carbohydrate metabolic process | 38/494 | 52/785 | 0.075863 | 0.636676 |
| GO:0006732 | coenzyme metabolic process | 16/494 | 20/785 | 0.082181 | 0.636676 |
| GO:0019219 | regulation of nucleobase-containing compound metabolic process | 65/494 | 93/785 | 0.084717 | 0.636676 |
| GO:0031323 | regulation of cellular metabolic process | 65/494 | 93/785 | 0.084717 | 0.636676 |
| GO:0051171 | regulation of nitrogen compound metabolic process | 65/494 | 93/785 | 0.084717 | 0.636676 |
| GO:0060255 | regulation of macromolecule metabolic process | 65/494 | 93/785 | 0.084717 | 0.636676 |
| GO:0009889 | regulation of biosynthetic process | 64/494 | 92/785 | 0.097932 | 0.636676 |
| GO:0010556 | regulation of macromolecule biosynthetic process | 64/494 | 92/785 | 0.097932 | 0.636676 |
| GO:0031326 | regulation of cellular biosynthetic process | 64/494 | 92/785 | 0.097932 | 0.636676 |

The Gene Ontology (GO) database provides a comprehensive framework for the description of gene functions and is classified into three categories: Biological Process, Cellular Component, and Molecular Function. GO enrichment analysis was performed with a significance threshold of adjusted *p* (padj) < 0.05

Table S2 Significant GO term in LC vs. control comparison

| GOID | Description | GeneRatio | BgRatio | pvalue | padj |
| --- | --- | --- | --- | --- | --- |
| GO:0055114 | oxidation-reduction process | 48/389 | 65/785 | 2.86E-05 | 0.005987 |
| GO:0006520 | cellular amino acid metabolic process | 37/389 | 58/785 | 0.016779 | 0.963743 |
| GO:0050794 | regulation of cellular process | 69/389 | 118/785 | 0.022473 | 0.963743 |
| GO:0008652 | cellular amino acid biosynthetic process | 17/389 | 24/785 | 0.027066 | 0.963743 |
| GO:0050789 | regulation of biological process | 69/389 | 119/785 | 0.028778 | 0.963743 |
| GO:0007154 | cell communication | 20/389 | 30/785 | 0.041531 | 0.963743 |
| GO:0007165 | signal transduction | 20/389 | 30/785 | 0.041531 | 0.963743 |
| GO:0023052 | signaling | 20/389 | 30/785 | 0.041531 | 0.963743 |
| GO:0019752 | carboxylic acid metabolic process | 47/389 | 80/785 | 0.052652 | 0.963743 |
| GO:0043436 | oxoacid metabolic process | 47/389 | 80/785 | 0.052652 | 0.963743 |
| GO:0065007 | biological regulation | 69/389 | 122/785 | 0.056391 | 0.963743 |
| GO:0044281 | small molecule metabolic process | 76/389 | 136/785 | 0.063052 | 0.963743 |
| GO:0006082 | organic acid metabolic process | 47/389 | 81/785 | 0.067598 | 0.963743 |
| GO:1901605 | alpha-amino acid metabolic process | 16/389 | 25/785 | 0.102613 | 0.963743 |
| GO:1901607 | alpha-amino acid biosynthetic process | 12/389 | 18/785 | 0.108845 | 0.963743 |
| GO:0071704 | organic substance metabolic process | 251/389 | 489/785 | 0.114104 | 0.963743 |
| GO:0006399 | tRNA metabolic process | 18/389 | 29/785 | 0.117959 | 0.963743 |
| GO:0000160 | phosphorelay signal transduction system | 14/389 | 22/785 | 0.130422 | 0.963743 |
| GO:0035556 | intracellular signal transduction | 14/389 | 22/785 | 0.130422 | 0.963743 |
| GO:0043038 | amino acid activation | 14/389 | 22/785 | 0.130422 | 0.963743 |
| GO:0043039 | tRNA aminoacylation | 14/389 | 22/785 | 0.130422 | 0.963743 |
| GO:0051716 | cellular response to stimulus | 28/389 | 48/785 | 0.134191 | 0.963743 |
| GO:0019222 | regulation of metabolic process | 52/389 | 94/785 | 0.1397 | 0.963743 |
| GO:0080090 | regulation of primary metabolic process | 52/389 | 94/785 | 0.1397 | 0.963743 |
| GO:0009987 | cellular process | 248/389 | 485/785 | 0.146343 | 0.963743 |
| GO:1901564 | organonitrogen compound metabolic process | 114/389 | 216/785 | 0.15078 | 0.963743 |
| GO:0019725 | cellular homeostasis | 7/389 | 10/785 | 0.163082 | 0.963743 |
| GO:0019219 | regulation of nucleobase-containing compound metabolic process | 51/389 | 93/785 | 0.164744 | 0.963743 |
| GO:0031323 | regulation of cellular metabolic process | 51/389 | 93/785 | 0.164744 | 0.963743 |
| GO:0051171 | regulation of nitrogen compound metabolic process | 51/389 | 93/785 | 0.164744 | 0.963743 |

Table S3 Significant GO term in HC vs. control comparison

| GO ID | GO Term | GO Class | P value | AdjustedPv | x | y | n | N | GOlevl |
| --- | --- | --- | --- | --- | --- | --- | --- | --- | --- |
| GO:0005634 | nucleus | CC | 3.80E-10 | 3.26E-07 | 43 | 273 | 281 | 4313 | 5 |
| GO:0043231 | intracellular membrane-bounded organelle | CC | 8.30E-07 | 0.000238 | 49 | 392 | 281 | 4313 | 4 |
| GO:0000785 | chromatin | CC | 1.22E-06 | 0.000262 | 7 | 11 | 281 | 4313 | 3 |
| GO:0031491 | nucleosome binding | MF | 6.45E-06 | 0.001108 | 5 | 6 | 281 | 4313 | 5 |
| GO:0006325 | chromatin organization | BP | 7.88E-05 | 0.011285 | 9 | 30 | 281 | 4313 | 5 |
| GO:0003677 | DNA binding | MF | 0.00013 | 0.013311 | 31 | 247 | 281 | 4313 | 5 |
| GO:0003682 | chromatin binding | MF | 0.000139 | 0.013311 | 6 | 14 | 281 | 4313 | 4 |
| GO:0006333 | chromatin assembly or disassembly | BP | 0.000139 | 0.013311 | 6 | 14 | 281 | 4313 | 6 |
| GO:0000786 | nucleosome | CC | 0.000238 | 0.018616 | 4 | 6 | 281 | 4313 | 4 |
| GO:0005694 | chromosome | CC | 0.000291 | 0.020846 | 9 | 35 | 281 | 4313 | 5 |
| GO:0032040 | small-subunit processome | CC | 0.000528 | 0.032381 | 4 | 7 | 281 | 4313 | 6 |
| GO:0006334 | nucleosome assembly | BP | 0.000944 | 0.037303 | 5 | 13 | 281 | 4313 | 6 |
| GO:0071103 | DNA conformation change | BP | 0.000954 | 0.037303 | 6 | 19 | 281 | 4313 | 6 |
| GO:0006022 | aminoglycan metabolic process | BP | 0.001002 | 0.037303 | 4 | 8 | 281 | 4313 | 5 |
| GO:0031492 | nucleosomal DNA binding | MF | 0.001042 | 0.037303 | 3 | 4 | 281 | 4313 | 6 |
| GO:0032403 | protein complex binding | MF | 0.001323 | 0.045462 | 7 | 27 | 281 | 4313 | 4 |
| GO:0034061 | DNA polymerase activity | MF | 0.001711 | 0.054431 | 4 | 9 | 281 | 4313 | 6 |
| GO:0006364 | rRNA processing | BP | 0.001977 | 0.058558 | 5 | 15 | 281 | 4313 | 6 |
| GO:0044877 | macromolecular complex binding | MF | 0.003616 | 0.097067 | 8 | 40 | 281 | 4313 | 3 |
| GO:0051276 | chromosome organization | BP | 0.004544 | 0.11339 | 7 | 33 | 281 | 4313 | 5 |
| GO:0043229 | intracellular organelle | CC | 0.00462 | 0.11339 | 57 | 620 | 281 | 4313 | 3 |
| GO:0044085 | cellular component biogenesis | BP | 0.004786 | 0.114196 | 13 | 91 | 281 | 4313 | 3 |
| GO:0042254 | ribosome biogenesis | BP | 0.005499 | 0.127657 | 6 | 26 | 281 | 4313 | 5 |
| GO:0030203 | glycosaminoglycan metabolic process | BP | 0.007867 | 0.168937 | 3 | 7 | 281 | 4313 | 6 |
| GO:0006629 | lipid metabolic process | BP | 0.00995 | 0.202923 | 8 | 47 | 281 | 4313 | 4 |
| GO:0043044 | ATP-dependent chromatin remodeling | BP | 0.012144 | 0.202923 | 2 | 3 | 281 | 4313 | 7 |
| GO:0030212 | hyaluronan metabolic process | BP | 0.012144 | 0.202923 | 2 | 3 | 281 | 4313 | 8 |
| GO:0003676 | nucleic acid binding | MF | 0.012711 | 0.202923 | 57 | 646 | 281 | 4313 | 4 |
| GO:0044424 | intracellular part | CC | 0.013364 | 0.202923 | 65 | 756 | 281 | 4313 | 3 |
| GO:0043933 | macromolecular complex subunit organization | BP | 0.013778 | 0.202923 | 11 | 79 | 281 | 4313 | 4 |
| GO:0071840 | cellular component organization or biogenesis | BP | 0.013892 | 0.202923 | 22 | 201 | 281 | 4313 | 2 |
| GO:0004867 | serine-type endopeptidase inhibitor activity | MF | 0.017123 | 0.237238 | 3 | 9 | 281 | 4313 | 7 |
| GO:0038023 | signaling receptor activity | MF | 0.021354 | 0.281249 | 4 | 17 | 281 | 4313 | 3 |
| GO:0008171 | O-methyltransferase activity | MF | 0.023246 | 0.281249 | 2 | 4 | 281 | 4313 | 6 |
| GO:0005262 | calcium channel activity | MF | 0.023246 | 0.281249 | 2 | 4 | 281 | 4313 | 8 |
| GO:0070588 | calcium ion transmembrane transport | BP | 0.023246 | 0.281249 | 2 | 4 | 281 | 4313 | 9 |
| GO:0015276 | ligand-gated ion channel activity | MF | 0.023246 | 0.281249 | 2 | 4 | 281 | 4313 | 6 |
| GO:0004871 | signal transducer activity | MF | 0.026947 | 0.317084 | 6 | 36 | 281 | 4313 | 2 |
| GO:0044255 | cellular lipid metabolic process | BP | 0.037021 | 0.405547 | 5 | 29 | 281 | 4313 | 4 |
| GO:0042393 | histone binding | MF | 0.037091 | 0.405547 | 2 | 5 | 281 | 4313 | 4 |
| GO:0043565 | sequence-specific DNA binding | MF | 0.04141 | 0.405547 | 7 | 50 | 281 | 4313 | 6 |
| GO:0005622 | intracellular | CC | 0.046599 | 0.405547 | 68 | 840 | 281 | 4313 | 3 |

x: Number of differentially expressed proteins (DEPs) associated with the specific GO term. y: Total number of background proteins associated with the same GO term. n: Number of DEPs annotated in the GO database. N: Total number of background proteins annotated in the GO database. GOlevl: Hierarchical level of the term within the GO database structure

Table S4 Significant GO term in LC vs. control comparison

| GO ID | GO Term | GO Class | P value | AdjustedPv | x | y | n | N | GOlevl |
| --- | --- | --- | --- | --- | --- | --- | --- | --- | --- |
| GO:0009982 | pseudouridine synthase activity | MF | 0.000645 | 0.150244 | 2 | 2 | 110 | 4313 | 5 |
| GO:0044707 | single-multicellular organism process | BP | 0.00093 | 0.150244 | 4 | 18 | 110 | 4313 | 3 |
| GO:0005577 | fibrinogen complex | CC | 0.001902 | 0.150244 | 2 | 3 | 110 | 4313 | 3 |
| GO:0030168 | platelet activation | BP | 0.001902 | 0.150244 | 2 | 3 | 110 | 4313 | 5 |
| GO:0001522 | pseudouridine synthesis | BP | 0.00374 | 0.150244 | 2 | 4 | 110 | 4313 | 7 |
| GO:0005615 | extracellular space | CC | 0.003831 | 0.150244 | 3 | 13 | 110 | 4313 | 3 |
| GO:0005576 | extracellular region | CC | 0.011537 | 0.341509 | 5 | 54 | 110 | 4313 | 2 |
| GO:0070647 | protein modification by small protein conjugation or removal | BP | 0.016585 | 0.341509 | 4 | 39 | 110 | 4313 | 7 |
| GO:2001070 | starch binding | MF | 0.025504 | 0.341509 | 1 | 1 | 110 | 4313 | 5 |
| GO:0008274 | gamma-tubulin ring complex | CC | 0.025504 | 0.341509 | 1 | 1 | 110 | 4313 | 6 |
| GO:0033566 | gamma-tubulin complex localization | BP | 0.025504 | 0.341509 | 1 | 1 | 110 | 4313 | 7 |
| GO:0004506 | squalene monooxygenase activity | MF | 0.025504 | 0.341509 | 1 | 1 | 110 | 4313 | 6 |
| GO:0004371 | glycerone kinase activity | MF | 0.025504 | 0.341509 | 1 | 1 | 110 | 4313 | 6 |
| GO:0006071 | glycerol metabolic process | BP | 0.025504 | 0.341509 | 1 | 1 | 110 | 4313 | 5 |
| GO:0016607 | nuclear speck | CC | 0.025504 | 0.341509 | 1 | 1 | 110 | 4313 | 7 |
| GO:0000813 | ESCRT I complex | CC | 0.025504 | 0.341509 | 1 | 1 | 110 | 4313 | 4 |
| GO:0000281 | mitotic cytokinesis | BP | 0.025504 | 0.341509 | 1 | 1 | 110 | 4313 | 5 |
| GO:0005874 | microtubule | CC | 0.025504 | 0.341509 | 1 | 1 | 110 | 4313 | 6 |
| GO:0040001 | establishment of mitotic spindle localization | BP | 0.025504 | 0.341509 | 1 | 1 | 110 | 4313 | 5 |
| GO:0015630 | microtubule cytoskeleton | CC | 0.027402 | 0.345622 | 3 | 26 | 110 | 4313 | 6 |
| GO:0016579 | protein deubiquitination | BP | 0.030269 | 0.345622 | 3 | 27 | 110 | 4313 | 7 |
| GO:0007017 | microtubule-based process | BP | 0.035226 | 0.345622 | 4 | 49 | 110 | 4313 | 4 |
| GO:0044446 | intracellular organelle part | CC | 0.036865 | 0.345622 | 13 | 281 | 110 | 4313 | 3 |
| GO:0043234 | protein complex | CC | 0.040747 | 0.345622 | 12 | 255 | 110 | 4313 | 3 |
| GO:0036459 | thiol-dependent ubiquitinyl hydrolase activity | MF | 0.043244 | 0.345622 | 3 | 31 | 110 | 4313 | 5 |
| GO:0007275 | multicellular organism development | BP | 0.048039 | 0.345622 | 2 | 14 | 110 | 4313 | 4 |
| GO:0007166 | cell surface receptor signaling pathway | BP | 0.048039 | 0.345622 | 2 | 14 | 110 | 4313 | 5 |

Table S5 Significant KEGG term in HC vs. control comparison

| MapID | Map Title | P value | AdjustedPv | x | y | n | N |
| --- | --- | --- | --- | --- | --- | --- | --- |
| map00100 | Steroid biosynthesis | 0.001376 | 0.165245 | 4 | 10 | 167 | 3067 |
| map00120 | Primary bile acid biosynthesis | 0.001462 | 0.165245 | 3 | 5 | 167 | 3067 |
| map04080 | Neuroactive ligand-receptor interaction | 0.010443 | 0.77395 | 3 | 9 | 167 | 3067 |
| map05322 | Systemic lupus erythematosus | 0.013698 | 0.77395 | 5 | 27 | 167 | 3067 |
| map03008 | Ribosome biogenesis in eukaryotes | 0.025157 | 0.957826 | 8 | 66 | 167 | 3067 |
| map05034 | Alcoholism | 0.025429 | 0.957826 | 7 | 54 | 167 | 3067 |
| map05142 | Chagas disease (American trypanosomiasis) | 0.043757 | 1 | 6 | 48 | 167 | 3067 |

Table S6 Significant KEGG term in LC vs. control comparison

| MapID | Map Title | P value | AdjustedPv | x | y | n | N |
| --- | --- | --- | --- | --- | --- | --- | --- |
| map04610 | Complement and coagulation cascades | 9.44E-08 | 1.37E-05 | 8 | 28 | 69 | 3067 |
| map04622 | RIG-I-like receptor signaling pathway | 0.023883 | 0.87418 | 3 | 28 | 69 | 3067 |
| map04310 | Wnt signaling pathway | 0.03584 | 0.87418 | 4 | 56 | 69 | 3067 |
| map03022 | Basal transcription factors | 0.042699 | 0.87418 | 3 | 35 | 69 | 3067 |
| map00562 | Inositol phosphate metabolism | 0.049114 | 0.87418 | 3 | 37 | 69 | 3067 |

Table S7 Overlapped pathways and metabolites.

|  | Pathways | Metabolisms |
| --- | --- | --- |
| map00440 | Phosphonate and phosphinate metabolism | Foscarnet; Phosphoenolpyruvic acid |
| map00360 | Phenylalanine metabolism | 2-(2-Methylbenzamido)acetic acid; N-acetylphenylalanine; Capsaicin; D-(+)-Phenyllactic acid |
| map00030 | Pentose phosphate pathway | RIBOSE 5-PHOSPHATE; D-Ribose 1,5-bisphosphate |
| map00750 | Vitamin B6 metabolism | 3-Hydroxy-2-methylpyridine-4,5-dicarboxylate; Pyridoxal phosphate |
| map00592 | alpha-Linolenic acid metabolism | 9(S)-HpOTrE |
| map00790 | Folate biosynthesis | Neopterin; Dihydroneopterin phosphate |
| map04020 | Calcium signaling pathway | Cyclic ADP-ribose |
| map04918 | Thyroid hormone synthesis | RIBOSE 5-PHOSPHATE; NADPH |
| map00230 | Purine metabolism | RIBOSE 5-PHOSPHATE; Adenylosuccinic acid; inosine; Guanosine 5'-diphosphate |
| map00982 | Drug metabolism - cytochrome P450 | Aldophosphamide; Carboxyphosphamide |
| map00565 | Ether lipid metabolism | LysoPA(P-16:0/0:0) |
| map00590 | Arachidonic acid metabolism | (plusmn)5,6-DHET |
| map00730 | Thiamine metabolism | Pyridoxal phosphate |
| map03013 | RNA transport | Guanosine 5'-diphosphate |
| map04014 | Ras signaling pathway | Guanosine 5'-diphosphate |
| map04015 | Rap1 signaling pathway | Guanosine 5'-diphosphate |
| map04080 | Neuroactive ligand-receptor interaction | Thyrotropin-releasing hormone |
| map04144 | Endocytosis | Guanosine 5'-diphosphate |
| map04972 | Pancreatic secretion | Cyclic ADP-ribose |
| map00010 | Glycolysis / Gluconeogenesis | Phosphoenolpyruvic acid |
| map00250 | Alanine, aspartate and glutamate metabolism | N-Acetyl-L-aspartic acid; Adenylosuccinic acid |
| map04750 | Inflammatory mediator regulation of TRP channels | Capsaicin |
| map04921 | Oxytocin signaling pathway | Cyclic ADP-ribose |
| map04970 | Salivary secretion | Cyclic ADP-ribose |
| map04726 | Serotonergic synapse | (plusmn)5,6-DHET |
